# Supplementary material for: Global trends in mangrove forest fragmentation
Source: PubMed Central journal article supplement (PMC7188678; doi:10.1038/s41598-020-63880-1), 2020-04-28
Supplement: 41598_2020_63880_MOESM1_ESM.pdf [file 41598_2020_63880_MOESM1_ESM.pdf]

1 **Supplementary information**

2 Global trends in mangrove forest fragmentation

3 **Authors**

4 Dale N. Bryan-Brown

5 Rod M. Connolly

6 Daniel R. Richards

7 Maria Fernanda Adame

8 Daniel A. Friess

9 Christopher J. Brown

## 10 **Supplementary materials 1**

11 All following equations and explanations are derived from the Fragstats (version 4.2) help  
12 manual.

### 13 **The clumpiness index**

$$14 \quad G_i = \left( \frac{g_{ii}}{\sum_{k=1}^m g_{ik}} \right)$$

$$15 \quad CLUMPY = \begin{cases} \frac{G_i - P_i}{1 - P_i} & \text{for } G_i \geq P_i \\ \frac{G_i - P_i}{1 - P_i} & \text{for } G_i < P_i ; P_i \geq 0.5 \\ \frac{G_i - P_i}{-P_i} & \text{for } G_i < P_i ; P_i < 0.5 \end{cases}$$

16 Where  $g_{ii}$  = number of adjacencies between focal habitat and focal habitat,  $g_{ik}$  = number of  
17 adjacencies between focal habitat and non-focal habitat (m),  $P_i$  = percentage of landscape  
18 occupied by the habitat

19 CLUMPY ranges from -1 to 1

20 CLUMPY = -1 is a maximally disaggregated habitat;

21 CLUMPY = 0 is a randomly distributed habitat;

22 CLUMPY = 1 is a maximally aggregated habitat;

23 This is a metric of like adjacencies (contagion) which is normalised by quantity of habitat in  
24 the landscape.

### 25 **Perimeter-Area fractal dimension**

$$26 \quad PAFRAC = \frac{2}{\frac{[n_i \sum_{j=1}^n (\sum_{j=1}^n \ln p_{ij} \cdot \sum_{j=1}^n \ln a_{ij})] - [(\sum_{j=1}^n \ln p_{ij})(\sum_{j=1}^n \ln a_{ij})]}{(n_i \sum_{j=1}^n \ln p_{ij}^2) - (\sum_{j=1}^n \ln p_{ij})}}$$

27 Where  $n_i$  is the number of patches in the landscape of habitat type  $i$ ,  $p_{ij}$  and  $a_{ij}$  are the  
28 perimeter and area of patch  $ij$ , respectively.

29 PAFRAC ranges from 1 (patches are simple geometric shapes) and tends to 2

30 PAFRAC = 1; patch shape is simple

31 PAFRAC = 2; patch has theoretical maximal convolution

32 PAFRAC employs regression analysis on landscapes, accordingly only landscapes with

33  $NP > 20$  were considered when mapping and modelling PAFRAC in mangroves

#### 34 **Mean patch area**

35 
$$AREA_{MN} = \frac{\sum a_{ij}}{n}$$

36 Where  $a_i$  is the area of patch  $i$  of habitat  $j$  (in hectares) and  $n$  is number of patches.

#### 37 **Mean Euclidean nearest neighbour**

38 
$$ENN_{MN} = \frac{\sum \min(h_{ij})}{n}$$

39 Where  $h_{ij}$  is the distance in metres between patch  $i$  and  $j$ , and  $n$  is the number of patches in the  
40 landscape

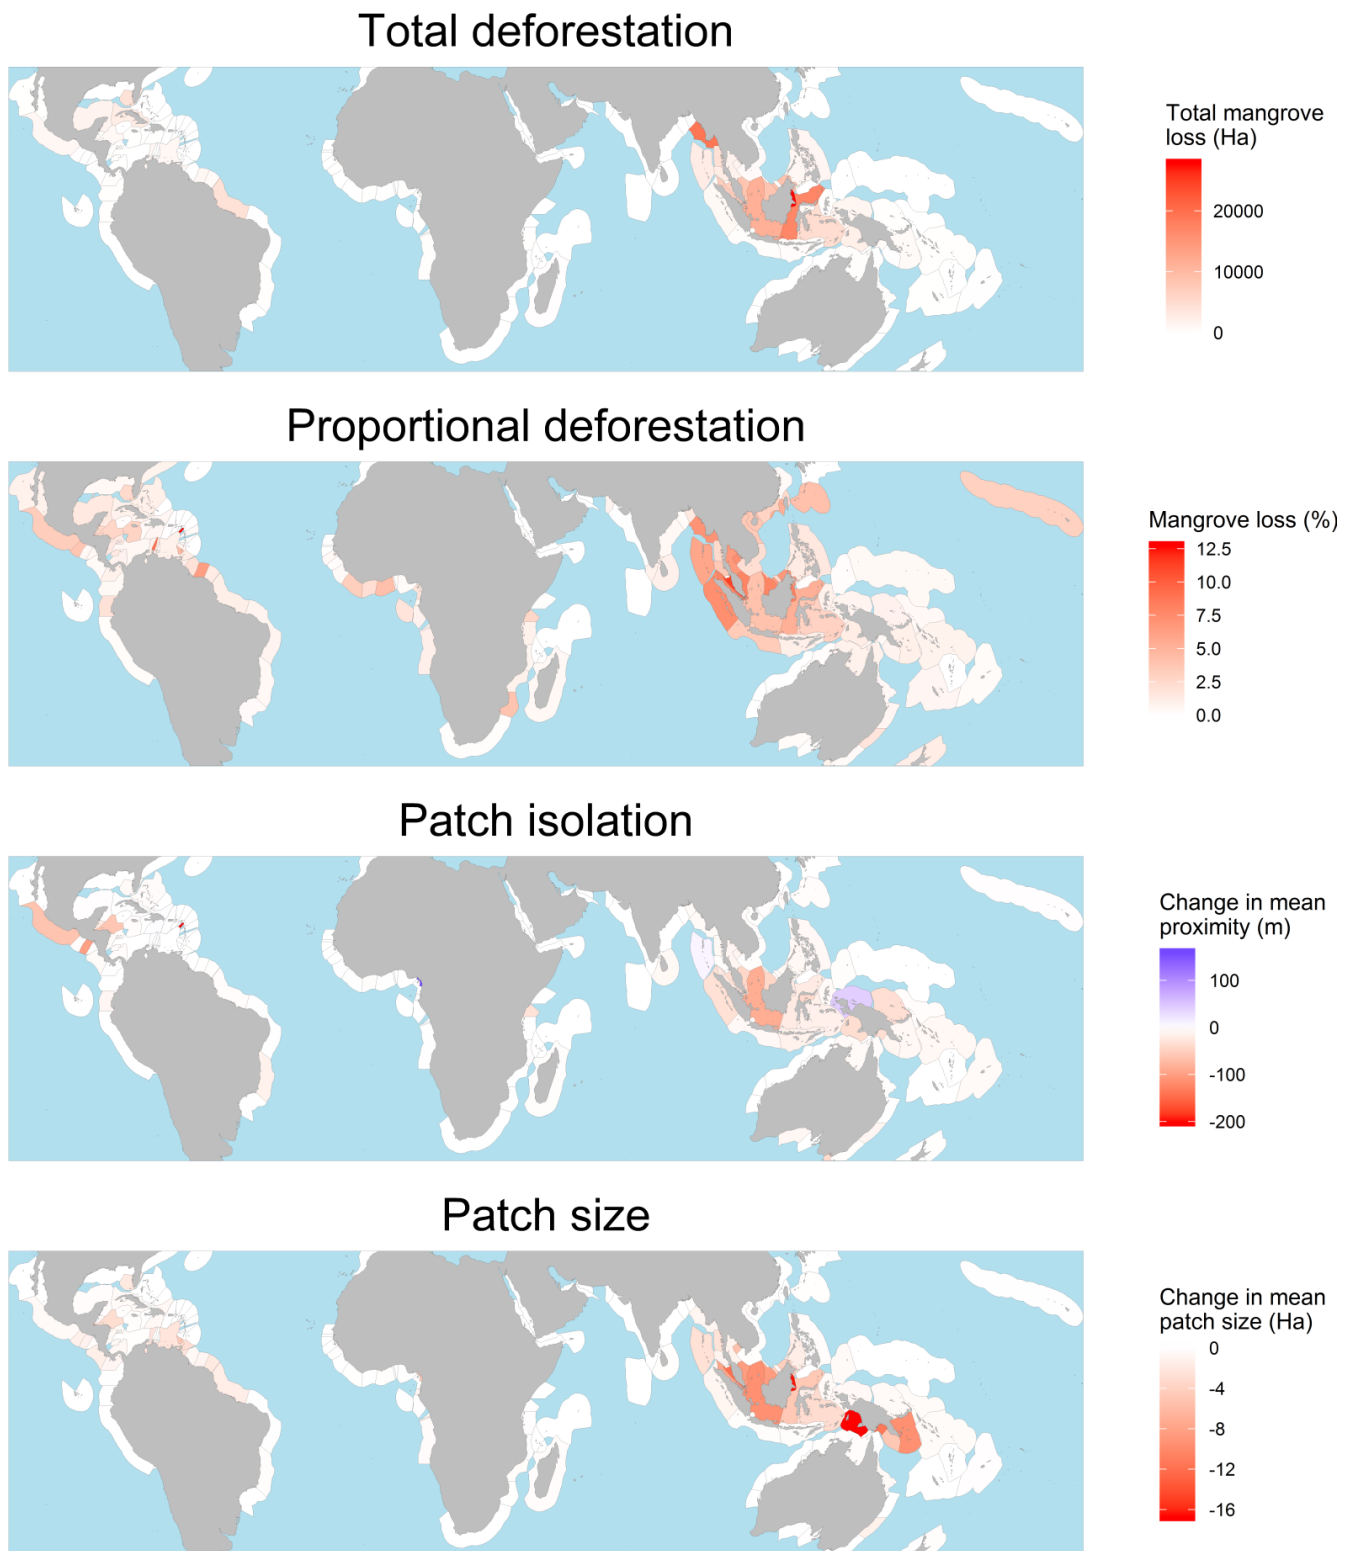

42 **Supplementary Figure S2(a):** The global distribution of shifts in the four metrics reported in  
43 the paper. Panel A) Total mangrove loss, B) Proportional mangrove loss, C) shift in the  
44 distance to nearest mangrove patch and, D) change in average size of mangrove patches.

## Mean number of patches

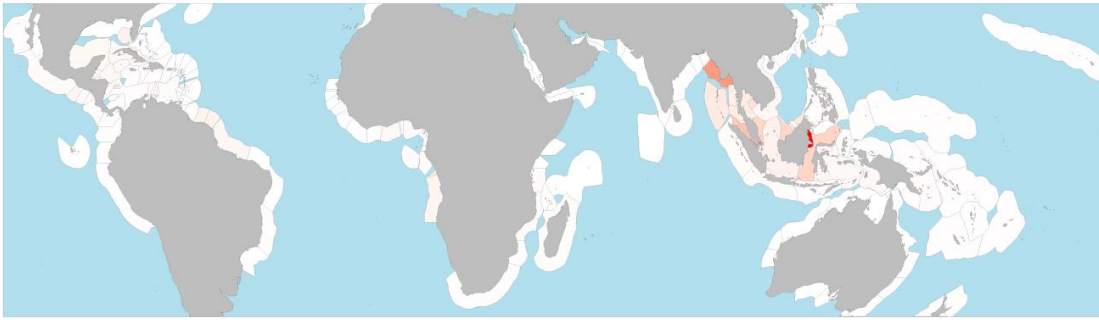

Mean change in number of patches (mean)

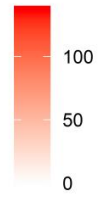

## Total number of patches

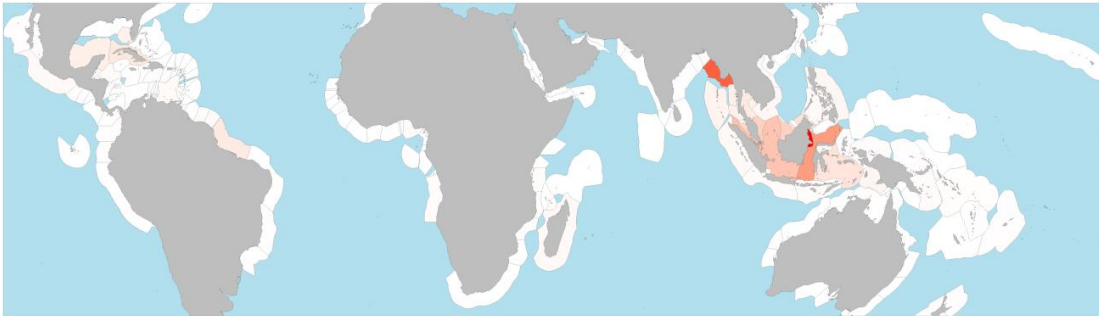

Total change in number of patches (n)

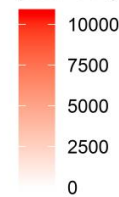

## Patch shape - PAFRAC

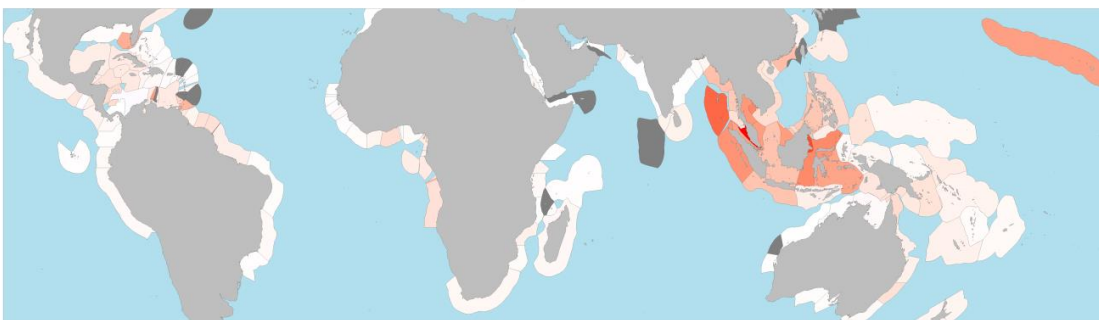

Change in PAFRAC (unitless)

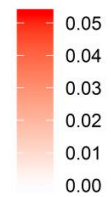

## Patch shape - clumpiness

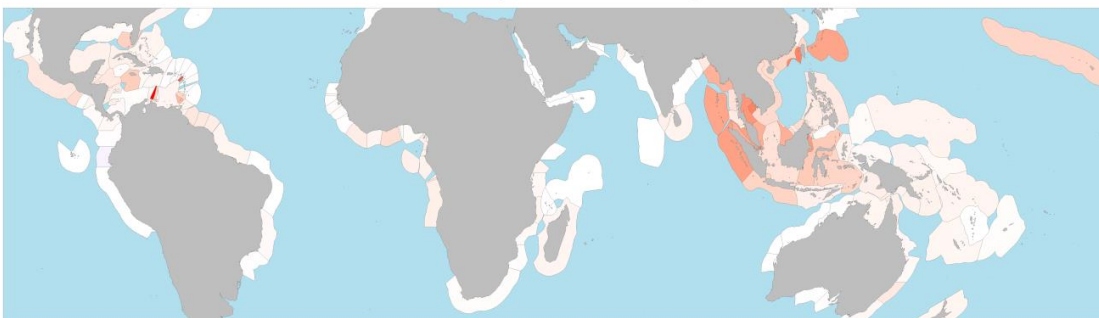

Change in clumpiness index (unitless)

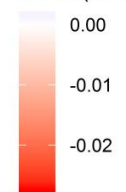

45 Supplementary Figure S1(b): The global distribution of shifts in the three metrics unreported  
46 in the paper. Panel A) and B) show the mean and total shift in number of patches,  
47 respectively. Panel C) and D) shows the distribution of shifts in average patch shape, as  
48 measured by PAFRAC and the clumpiness index, respectively.

49 **Supplementary Table S1**

50 The Spearman rank correlations (mangrove fragmentation as a function of mangrove loss) for  
 51 different fragmentation metrics. Correlation coefficients are given with p-values in  
 52 parentheses. Table A shows the relationship between fragmentation and loss for each land-  
 53 use transition. Table B shows the relationship between fragmentation and loss without  
 54 considering the dominant land-use transition of the landscapes.

55 Table A:

|                      | Clumpiness index         | PAFRAC                   | Mean patch size          | Mean Euclidean nearest neighbouring patch |
|----------------------|--------------------------|--------------------------|--------------------------|-------------------------------------------|
| Aquaculture          | 0.53509<br>(p < 0.00001) | 0.58419<br>(p < 0.00001) | 0.73112<br>(p < 0.00001) | 0.49822<br>(p < 0.00001)                  |
| Rice plantations     | 0.55937<br>(p < 0.00001) | 0.68847<br>(p < 0.00001) | 0.63448<br>(p < 0.00001) | 0.43210<br>(p = 0.00003)                  |
| Oil palm plantations | 0.25241<br>(p < 0.00001) | 0.32181<br>(p < 0.00001) | 0.67644<br>(p < 0.00001) | 0.30532<br>(p < 0.00001)                  |
| Mangrove regrowth    | 0.33155<br>(p = 0.00001) | 0.37602<br>(p < 0.00001) | 0.72454<br>(p < 0.00001) | 0.31218<br>(p = 0.00005)                  |
| Urban developments   | 0.34229<br>(p = 0.00068) | 0.56971<br>(p < 0.00001) | 0.53678<br>(p < 0.00001) | 0.24801<br>(p = 0.01713)                  |
| Other                | 0.35591<br>(p < 0.00001) | 0.37341<br>(p < 0.00001) | 0.59747<br>(p < 0.00001) | 0.34039<br>(p < 0.00001)                  |

56

57 Table B

|                | Clumpiness index       | PAFRAC                 | Mean patch size         | Mean Euclidean nearest neighbour |
|----------------|------------------------|------------------------|-------------------------|----------------------------------|
| All landscapes | 0.38260<br>(1.77 E-49) | 0.44830<br>(8.90 E-63) | 0.66359<br>(2.08 E-176) | 0.37191<br>(3.47 E-46)           |

58
